# Supplementary material for: Approximating uncertainty of annual runoff and reservoir yield using stochastic replicates of global climate model data
Source: Copernicus journal article supplement (doi:10.5194/hess-19-1615-2015), 2015-04-08
Supplement: Supplementary file 1 [file hess-19-1615-2015-supplement.zip]

Archive with 5 entries (5 files):
- hess-19-1615-2015-supplement-cover-letter.pdf
- Readme.pdf
- PERM.pdf
- PERM example input and output.txt
- PERM Function code.pdf
