# Supplementary material for: Approximating uncertainty of annual runoff and reservoir yield using stochastic replicates of global climate model data
Source: Copernicus journal article supplement (doi:10.5194/hess-19-1615-2015), 2015-04-08
Supplement: Supplementary file 1 [file hess-19-1615-2015-supplement.zip › PERM example input and output.txt]

Example input and output from PERM for an Australian catchment.

River			DONNELLY
Station			STRICKLAND
COUNTRY			AUSTRALIA
Latitude		-34.33
Longitude		115.77
Catchment Area (km^2)	780


The PERM model parameters used in the example are:

Smax	1062.8125
ETrate	7.4375
K	0.08125
Melt	0.93
Imax	59.125

Inputs to PERM are monthly Observed precipitation (mm) and observed temperature (degrees C).
Output from PERM is modelled runoff (mm).

		Obs.	Obs.	Obs.	Modelled
Year	Month	Precip	Temp	Runoff	Runoff
1961	1	25.9	21.4	0.9	4.052
1961	2	16.9	21.6	0.8	2.625
1961	3	51.1	20	0.2	1.701
1961	4	183.2	14.4	2.3	7.211
1961	5	72.6	14.4	3.9	9.57
1961	6	182.2	11.4	23.5	19.698
1961	7	217.1	9.9	58.7	41.543
1961	8	159.2	10.5	62.2	48.16
1961	9	92	12.9	42	32.498
1961	10	46.1	13.7	12.5	18.694
1961	11	25.4	16.2	3.7	12.804
1961	12	16.7	18.6	1.6	8.297
1962	1	4.5	22.1	0.5	5.376
1962	2	16	20.1	0.3	3.483
1962	3	20.1	16.9	0.4	2.257
1962	4	18.1	17.1	0.4	1.462
1962	5	146.9	14.5	1.8	5.092
1962	6	144.8	12.5	10.9	14.825
1962	7	154.2	10.6	22	22.648
1962	8	224.4	11.7	65.3	44.743
1962	9	93.2	11.7	39.7	29.663
1962	10	98.4	12	24.1	28.276
1962	11	63.2	16.7	7.5	16.307
1962	12	42.4	19.8	1.7	10.132
1963	1	77	19.9	0.8	8.716
1963	2	12.9	19.8	0.5	5.191
1963	3	20.1	19.9	0.3	3.363
1963	4	49.2	15.9	0.5	2.179
1963	5	254.7	13.6	9.1	11.829
1963	6	192.2	11.3	52.1	38.867
1963	7	234.7	9.9	103.2	64.196
1963	8	197.7	11	86.2	74.317
1963	9	99.7	12.3	47	45
1963	10	66.1	14.9	16.4	28.137
1963	11	25.2	16.7	5.1	18.792
1963	12	3.9	19.7	1.6	12.176
1964	1	1.2	19.4	0.9	7.889
1964	2	6.9	19.9	0.6	5.112
1964	3	13	18.8	0.5	3.312
1964	4	48.7	14.5	0.9	2.146
1964	5	47.2	12.7	1.6	1.391
1964	6	268.3	12.3	14.7	10.67
1964	7	288.6	10.8	81.1	60.101
1964	8	188.4	10	97.7	69.406
1964	9	81.9	10.9	23.4	37.892
1964	10	122	11.1	34.4	47.806
1964	11	36.1	14.5	8.5	23.608
1964	12	61.5	17.1	6.6	16.707
1965	1	8.1	20.7	1.9	10.555
1965	2	11.7	19.8	1.2	6.839
1965	3	125.7	18.4	2.7	10.593
1965	4	35	16.3	2.9	6.471
1965	5	154.2	12.4	8.7	12.697
1965	6	184.3	10.9	31.3	26.112
1965	7	130.6	9.8	61.5	30.035
1965	8	138.4	10.3	37.9	35.767
1965	9	89.6	12	32.5	26.515
1965	10	107.9	14.3	33.1	27.311
1965	11	132.3	15.3	31.4	28.995
1965	12	52.2	19.5	9	12.648
1966	1	25.2	20.4	3.5	8.195
1966	2	6.4	19.5	1.1	5.31
1966	3	18.9	18.8	1.1	3.441
1966	4	40.9	15.3	1.4	2.229
1966	5	79.1	12.6	2.7	2.517
1966	6	220	10.3	23.5	12.518
1966	7	163.7	9.9	45.3	31.838
1966	8	113	9.9	24.7	29.999
1966	9	108.8	10.8	35.9	29.909
1966	10	57.7	13	17.3	16.827
1966	11	13.6	16.7	5	11.917
1966	12	32.4	18.3	1.9	7.722
1967	1	5.7	20.5	1.2	5.003
1967	2	11.5	21.7	0.5	3.242
1967	3	26.9	18.2	0.6	2.101
1967	4	67.5	16.1	1.1	1.802
1967	5	158.9	13	3.5	6.595
1967	6	238.5	12.3	34.8	28.657
1967	7	235.4	10	98.2	57.416
1967	8	138.5	9.6	64.8	50.929
1967	9	57.5	12.4	35	25.518
1967	10	31.5	15.2	9.5	18.924
1967	11	38.3	16.3	4	12.262
1967	12	42	18.9	2.8	7.945
1968	1	43.6	20.4	1.8	5.148
1968	2	3.4	19.5	0.9	3.336
1968	3	47.5	15.8	1.1	2.161
1968	4	80.1	13.7	2.4	2.514
1968	5	65.7	11.3	3.6	2.499
1968	6	195.4	10.6	16.5	9.776
1968	7	176.7	10.1	40.8	28.761
1968	8	138.4	9.2	56	34.059
1968	9	119.4	10.5	42.6	34.263
1968	10	91.8	12.5	25.1	27.333
1968	11	22.9	14.5	7.5	15.264
1968	12	5.8	17.9	2.8	9.89
1969	1	10.3	19.3	1.3	6.409
1969	2	1.3	20.1	0.6	4.152
1969	3	20.7	18.5	0.6	2.691
1969	4	115.5	15.5	2.3	4.989
1969	5	62.6	13	2.6	4.61
1969	6	130	11.8	6.4	8.184
1969	7	125	10.4	18.7	13.706
1969	8	74.9	10.5	16.5	11.099
1969	9	37.4	10.2	8.4	7.208
1969	10	7.5	15.7	2.8	4.671
1969	11	68.6	16.9	2.5	3.73
1969	12	12.1	18.9	0.7	2.483
1970	1	5.3	20.6	0.3	1.609
1970	2	56.5	22.1	0.4	1.043
1970	3	7.7	19.7	0.2	0.676
1970	4	101.9	14.9	1	2.174
1970	5	102.3	13	2.4	5.768
1970	6	271	11.1	33.7	23.897
1970	7	143.6	11.3	39	37.724
1970	8	103.9	10.4	40.8	31.006
1970	9	108.3	11.7	23.4	31.209
1970	10	80.5	13	31	22.628
1970	11	35	15.5	5.7	13.453
1970	12	6.6	19.4	1.7	8.717
1971	1	33.2	20	1	5.648
1971	2	31.8	20	1.1	3.66
1971	3	57.5	18.6	0.7	2.371
1971	4	38.3	15	1.4	1.536
1971	5	149.3	12.5	4.8	5.31
1971	6	106.5	11.4	13	11.119
1971	7	112.4	10.6	16.4	13.41
1971	8	112.7	9.9	23.1	16.271
1971	9	174.9	10.7	35.5	29.152
1971	10	131.7	11.9	56	31.438
1971	11	68.1	13.3	14.7	17.87
1971	12	8	16.7	4.7	11.537
1972	1	8.5	20.8	1.6	7.475
1972	2	5.5	22.2	0.7	4.844
1972	3	18.1	19	0.6	3.138
1972	4	59.1	15.7	1.1	2.033
1972	5	62.1	14.9	1.4	1.472
1972	6	124.9	11.4	3.5	4.191
1972	7	172.1	10.6	16	15.321
1972	8	171.5	10.2	41.3	29.622
1972	9	77.9	12	23.2	19.855
1972	10	56.7	13.4	8.1	12.529
1972	11	6	17.5	2.4	8.388
1972	12	5.5	21.2	0.8	5.435
1973	1	14.2	20.8	0.4	3.521
1973	2	11.4	20	0.2	2.282
1973	3	3.8	18.2	0.1	1.478
1973	4	107.8	15.8	0.6	3.263
1973	5	145.5	13.2	2.8	10.2
1973	6	175.3	9.8	20.5	22.649
1973	7	236.8	11.1	59.7	49.543
1973	8	145	10.1	65.3	47.898
1973	9	153.7	11.6	46.2	53.689
1973	10	71	13.7	21.7	28.131
1973	11	47.3	16	11.2	18.253
1973	12	9.3	17.9	2.5	11.901
1974	1	5.6	21.6	0.9	7.711
1974	2	31.4	20.1	0.7	4.996
1974	3	3.4	19.4	0.5	3.237
1974	4	72.1	15.5	0.9	2.905
1974	5	190.2	12.9	5.2	10.212
1974	6	117.6	11.7	19.1	17.905
1974	7	268.9	10.4	78.2	44.854
1974	8	137.4	11	73.5	45.353
1974	9	44.5	12.6	15.4	21.882
1974	10	93.8	13.1	10.1	24.932
1974	11	53.2	15.4	7.2	13.557
1974	12	3.9	18.8	2.1	8.784
1975	1	5.6	19.7	0.9	5.692
1975	2	1.6	23	0.4	3.688
1975	3	47.4	17.7	0.5	2.39
1975	4	60.6	15	0.9	1.629
1975	5	151.9	13.5	3	5.635
1975	6	151.8	11.7	12.1	16.716
1975	7	213.6	10.9	39.1	34.841
1975	8	83.8	10.4	40	24.193
1975	9	100.1	11.4	20.9	25.857
1975	10	49.2	13.8	11.5	14.313
1975	11	39	15.7	4.3	9.43
1975	12	8.4	19.5	1.4	6.11
1976	1	76.6	20	1.6	5.469
1976	2	55.2	21.5	0.5	3.516
1976	3	8.6	19.6	0.3	2.278
1976	4	117.2	17	1.6	4.618
1976	5	119.3	14.3	2.3	9.641
1976	6	89.9	11.6	6.6	9.527
1976	7	109.4	12	12.3	11.003
1976	8	128.8	11.4	30.9	14.792
1976	9	73.7	12.8	10.9	10.424
1976	10	77.5	15.3	8.8	8.255
1976	11	98.8	14.5	6.8	8.89
1976	12	19.5	18.6	2.4	5.337
1977	1	15.5	20.5	0.6	3.458
1977	2	6	22.2	0.2	2.24
1977	3	16	17.4	0.2	1.452
1977	4	8.2	16.7	0.2	0.941
1977	5	155.3	13.1	1.8	4.728
1977	6	123.8	11.8	7.1	13.228
1977	7	110.5	11.5	13.9	14.678
1977	8	161.8	11.6	35.7	23.48
1977	9	62.1	11.7	11.4	13.206
1977	10	135.4	13.9	18.9	21.005
1977	11	28.2	16.6	6.7	9.929
1977	12	21	21.1	1.2	6.434
1978	1	7.6	21.7	0.4	4.169
1978	2	16.3	21.5	0.1	2.701
1978	3	11	21.5	0.1	1.75
1978	4	29.6	17.5	0.2	1.134
1978	5	193.8	13.6	2.7	6.721
1978	6	202.1	11.1	16.1	29.398
1978	7	202	9.9	68.4	48.696
1978	8	50.5	11.5	21.8	21.856
1978	9	137.4	11.6	32.3	36.958
1978	10	59.8	13.8	29.6	18.216
1978	11	54.5	17.6	4.7	12.752
1978	12	32.4	19.6	1.8	8.263
1979	1	11.6	20.2	0.7	5.354
1979	2	14.6	20.4	0.4	3.469
1979	3	28.4	19.2	0.5	2.248
1979	4	55.5	15.7	1	1.456
1979	5	89.3	12.2	2.1	2.367
1979	6	127.4	12.1	5.9	6.772
1979	7	141.8	10.8	22.8	14.356
1979	8	93.1	10.2	19	14.488
1979	9	87.1	11.9	14	13.356
1979	10	99.3	14.3	20.8	13.216
1979	11	77	16.6	5.7	9.37
1979	12	13.8	19.7	1.6	5.527
1980	1	3.7	21.1	0.4	3.581
1980	2	17.1	19.8	0.2	2.32
1980	3	8.6	20.1	0.2	1.504
1980	4	105.3	14.7	1	3.171
1980	5	80	14	1.3	4.863
1980	6	130.4	11.1	3.6	8.76
1980	7	170.7	10.9	32.5	19.358
1980	8	148.5	11.6	39.2	27.893
1980	9	96	12.3	20.7	22.057
1980	10	86.6	11.6	16.8	18.406
1980	11	55.5	16.4	5.7	10.841
1980	12	15.9	18	2	7.024
1981	1	4.6	21.3	0.7	4.552
1981	2	3.2	18.4	0.3	2.949
1981	3	20.9	18.8	0.3	1.911
1981	4	79.5	17	0.7	2.277
1981	5	118.8	13.1	1.9	5.554
1981	6	193.6	9.6	13.2	18.343
1981	7	196.4	10.7	41.9	39.599
1981	8	181.1	10.5	81.9	51.468
1981	9	95.6	12.5	31	34.204
1981	10	60.7	14.3	15.6	20.224
1981	11	82.5	14.6	6.7	19.531
1981	12	18.4	16.9	3.5	10.856
1982	1	78	18.8	1.9	9.42
1982	2	26.5	19.6	0.9	5.54
1982	3	19.2	17.2	0.8	3.59
1982	4	5.9	15.4	0.7	2.326
1982	5	81.4	13.1	1.7	2.721
1982	6	177.6	10.4	9.9	10.09
1982	7	159.8	10.6	30.4	24.312
1982	8	68.3	11.4	17.8	15.337
1982	9	68.8	12.5	9.9	12.242
1982	10	50.9	14.7	6	7.714
1982	11	28.2	18.1	2.3	4.999
1982	12	21.2	18.9	1	3.239
1983	1	7.1	21.5	0.3	2.099
1983	2	51.2	19.6	0.4	1.36
1983	3	4.8	20.3	0.1	0.881
1983	4	21.7	16.7	0.2	0.571
1983	5	70.3	14.6	0.7	0.814
1983	6	196.9	12.7	2.8	7.262
1983	7	173.2	10.8	27.2	25.942
1983	8	171.5	12.3	46.8	37.463
1983	9	158.1	13.4	77.2	41.581
1983	10	31.2	14.4	9.2	17.214
1983	11	40.8	15.8	3	11.154
1983	12	8	19.3	1	7.227
1984	1	3.6	20.8	0.4	4.683
1984	2	15.5	21	0.1	3.034
1984	3	23.1	18	0.2	1.966
1984	4	47.5	17	0.3	1.274
1984	5	190.1	13.2	3.3	6.802
1984	6	141.8	11.3	18.6	20.176
1984	7	110.9	10.2	25.3	20.873
1984	8	157.4	10.4	40.3	31.487
1984	9	123.8	11.6	56.7	31.502
1984	10	41.9	14.6	8.8	15.402
1984	11	111.9	16.1	9.8	18.675
1984	12	40.8	16.4	3.1	9.093
1985	1	26	19.3	1.4	5.891
1985	2	22.7	23.6	0.4	3.817
1985	3	18.9	19.9	0.3	2.473
1985	4	99.6	15.5	0.9	3.859
1985	5	73.9	13.2	1.6	4.468
1985	6	109	13	4.4	6.621
1985	7	118.7	11.1	12.6	10.507
1985	8	217.3	11.2	48.2	26.183
1985	9	71	12.6	25.3	17.507
1985	10	55.9	13	8	11.357
1985	11	50.7	16.9	4.4	7.538
1985	12	26.4	16.6	1.7	4.885
1986	1	6.1	21.3	0.5	3.165
1986	2	58.8	19	0.3	2.051
1986	3	47	17.3	0.5	1.329
1986	4	20.2	15.2	0.5	0.861
1986	5	111.3	13.2	1.8	2.757
1986	6	89.4	11.3	2.4	5.711
1986	7	139.7	9.6	14.8	11.217
1986	8	136.2	9.8	24.8	19.451
1986	9	69.3	12.3	17.6	13.186
1986	10	73.2	12.3	9.8	10.57
1986	11	19.6	16.2	2.8	6.389
1986	12	5.4	18.1	0.8	4.14
1987	1	12	19.5	0.3	2.682
1987	2	1.1	19.6	0.1	1.738
1987	3	34	19.5	0.1	1.126
1987	4	71.9	16.4	0.5	1.297
1987	5	76	12.7	1.3	2.052
1987	6	98.7	12.3	2.5	4.005
1987	7	156.9	10.4	9.5	11.356
1987	8	77.9	11.5	15.2	11.093
1987	9	51.7	12.9	6.1	6.797
1987	10	37.5	13.6	2.8	4.404
1987	11	41.6	15.8	1.2	2.854
1987	12	35.6	19.2	0.5	1.849
1988	1	11.3	19.9	0.2	1.198
1988	2	6.3	22.6	0	0.776
1988	3	40.8	20.9	0	0.503
1988	4	43.5	17.8	0	0.326
1988	5	223.6	14.3	6.4	6.402
1988	6	259.3	12.2	71.9	42.76
1988	7	127.9	10.4	48.6	39.736
1988	8	141.5	11.3	46.6	44.926
1988	9	132.6	13.1	41.9	43.671
1988	10	80.7	14.4	33.4	26.903
1988	11	40.9	15.9	7.4	15.662
1988	12	11	19.1	1.8	10.148
1989	1	68.4	20.9	1.2	7.693
1989	2	56.3	20.7	0.5	4.747
1989	3	7.5	19.5	0.5	3.076
1989	4	63.7	16.2	0.8	2.271
1989	5	71.8	13.9	1.6	2.245
1989	6	78.1	11.3	2.1	2.802
1989	7	166.6	10.1	11.6	9.28
1989	8	126.9	10.7	23.5	18.075
1989	9	95.9	12.6	19	16.415
1989	10	144.8	13	32.1	22.321
1989	11	12.8	17.6	6	10.762
1989	12	23.5	17.9	1.1	6.973
1990	1	28.9	19	0.6	4.518
1990	2	46.5	20.8	0.4	2.928
1990	3	37.4	19.4	0.3	1.897
1990	4	109.7	15.8	1.2	3.803
1990	5	72.9	13.3	2.6	4.792
1990	6	65.8	10	6.5	3.626
1990	7	235.9	9.2	47.3	15.054
1990	8	139.2	10	46.1	31.295
1990	9	85.7	12.4	19.3	22.909
1990	10	96.8	13.7	15.2	21.781
1990	11	55.5	16.2	7.9	11.437
1990	12	10.5	18.5	1.9	7.411
1991	1	10.2	20.4	0.5	4.802
1991	2	21.4	19.9	0.1	3.111
1991	3	17.1	18.8	0.2	2.016
1991	4	36.7	17.6	0.4	1.306
1991	5	162.6	13.9	2	5.596
1991	6	171.5	12.1	16.7	20.145
1991	7	169.4	11	36.3	31.311
1991	8	161.2	11.2	54	39.539
1991	9	112.4	12.3	34.4	32.945
1991	10	45.7	15	11.2	16.509
1991	11	75.1	14.8	7.2	13.517
1991	12	13.9	19.5	1.7	7.737
1992	1	5.3	21.3	0.5	5.013
1992	2	12	20.9	0.2	3.248
1992	3	28	19	0.2	2.105
1992	4	34	16.5	0.3	1.364
1992	5	138.3	12.9	2.1	4.557
1992	6	190.7	11.7	9.2	18.747
1992	7	142.1	11.9	33.6	26.786
1992	8	187.2	10.4	41.9	40.765
1992	9	118.7	10.7	45.5	35.818
1992	10	25.1	14	10	17.92
1992	11	114.5	15.6	9.2	21.91
1992	12	18.7	18.1	2.9	10.209
