# Supplementary material for: Approximating uncertainty of annual runoff and reservoir yield using stochastic replicates of global climate model data
Source: Copernicus journal article supplement (doi:10.5194/hess-19-1615-2015), 2015-04-08
Supplement: Supplementary file 1 [file hess-19-1615-2015-supplement.zip › PERM Function code.pdf]

### Model code

To facilitate the use of PERM more widely the PERM code from Excel VBA is given below as a function. The PERM model parameters and their maximum and minimum values passed to this function are:

| <b>Parameter</b> | <b>Description</b>                           | <b>Range</b> |
|------------------|----------------------------------------------|--------------|
| <i>Smax</i>      | Soil moisture storage capacity (mm)          | [50 - 2000]  |
| <i>ETrate</i>    | Rate of evapotranspiration (mm / °C / month) | [0 - 200]    |
| <i>K</i>         | Baseflow linear recession constant           | [0 - 1]      |
| <i>Melt</i>      | Proportion of snowmelt volume to runoff      | [0 - 1]      |
| <i>Imax</i>      | Interception storage capacity (mm)           | [0 - 300]    |

The input data for this function is a two-dimensional array of monthly data of N (the number of months) rows x 6 columns. The data in each column are: (1) year; (2) month; (3) observed runoff (mm); (4) observed precipitation (mm); (5) observed temperature (°C); and (6) modelled runoff (mm) [filled by the function].

The function repeats the first 12 months twice, first to warm up the model stores and second to model the runoff.

-----Start of Excel VBA code -----

```
'  
' This is the PERM code for predicting monthly runoff from monthly precipitation and temperature data  
'  
' Written by Murray Peel and Tom McMahon from 2001 - 2007  
'  
Function PERM(MonData() As Double, N As Integer, Smax As Double, ETrate As Double, K As Double, Melt As Double, Imax As Double) As Double  
  
    Dim Sprex As Double, S As Double, ACCUM As Double, Base As Double, F As Double, MeltVol As Double, ASoET As Double  
    Dim R As Double, P As Double, T As Double, ET As Double, Qsnow As Double, Qsoil As Double, Qparea As Double  
    Dim ICprev As Double, ICt As Double, IC As Double, RGap As Double, ETSnow As Double  
    Dim Warmup As Integer, WarmCount As Integer, TSnow As Integer, ETallSnow As Integer  
  
' Run the data through the model  
  
    Sprex = 0.5 * Smax  
    ICprev = 0.5 * Imax  
    ACCUM = 0
```

```

ETallSnow = 0
TSnow = 0
ETSnow = 0
ASoET = 0
Warmup = 0
WarmCount = 0
For xx = 1 To N
    P = MonData(xx, 4)
    T = MonData(xx, 5)
    ' Check for Snow
    If T <= TSnow Then
        ACCUM = P + ACCUM
        R = 0
        ET = 0
        S = Sprev + R - ET
        Base = K * (Sprev + S) / 2
        F = Base
        ICt = 0
    Else
        ' Deal with any snow melt (no interception when there is snowpack)
        If ACCUM > 0 Then
            If T * ERate <= ACCUM Then
                MeltVol = T * ERate
                ETallSnow = 1
            Else
                MeltVol = ACCUM
                ETallSnow = 0
            End If
            ETSnow = MeltVol
            ACCUM = ACCUM - MeltVol
            ' Split the precip with the MeltVol to streamflow or soil infiltration
            R = (1 - Melt) * (MeltVol + P)
            Qsnow = Melt * (MeltVol + P)
            ICt = 0
        Else
            ' Take out the interception from the precipitation
            If P > Imax - ICprev Then
                R = P - (Imax - ICprev)
                IC = Imax
            End If
        End If
    End If
Next xx

```

```

Else
    R = 0
    IC = ICprev + P
End If
' Calculate ET from the interception store and see if any PET is left for the soil
If IC <= ETrate * T Then
    ICt = IC
    IC = 0
Else
    ICt = ETrate * T
    IC = IC - ICt
End If
ETSnow = 0
End If
' A quasi partial area infiltration component as a proportion of soil moisture status
Qparea = R * Sprex / Smax
R = R - Qparea
' Update the Soil store
If ETallSnow = 0 Then ' there is still some energy left after removing the snow pack
    ' Temporary estimate of S for averaging
    S = Sprex + R
    ' Check for water limited or energy limited case
    If 300 * ((S + Sprex) / 2) / Smax >= ETrate * T - ICt - ETSnow Then
        ' Energy limited
        ASoET = ETrate * T - ICt - ETSnow
    Else
        ' Water limited
        ASoET = 300 * ((S + Sprex) / 2) / Smax
    End If
    ' Calculate new soil moisture store based on real ASoET
    S = Sprex + R - ASoET
    ' Check that soil moisture store is not < 0
    If S < 0 Then
        ' There is more actual soil ET than soil water
        RGap = -S
        ' Reduce the actual soil ET
        ASoET = ASoET + S
        S = 0
    End If

```

```

' Calculate the total ET
ET = ICt + ASoET
Else
  S = SpreV + R
  ET = 0
End If
' Check for Quick flow
If S > Smax Then
  Qsoil = S - Smax
  S = Smax
End If
' Calculate Base flow
If S > 0 Then
  Base = K * (S + SpreV) / 2
  If Base > S Then
    Base = S
  End If
Else
  Base = 0
End If
' Calculate total flow
F = Qsnow + Qparea + Qsoil + Base
End If
MonData(xx, 6) = F
If Warmup = 0 Then
  If WarmCount = 12 Then
    Warmup = 1
    xx = 0
  Else
    WarmCount = WarmCount + 1
  End If
End If
' Set up for the next time step
SpreV = S - Base
If SpreV < 0 Then
  SpreV = 0
End If
ICprev = IC
RGap = 0

```

ETallSnow = 0

Qsnow = 0

Qparea = 0

Qsoil = 0

Base = 0

MeltVol = 0

ICt = 0

ETSnow = 0

ASoET = 0

Next

End Function

-----End of Excel VBA code -----
