# Supplementary material for: Approximating uncertainty of annual runoff and reservoir yield using stochastic replicates of global climate model data
Source: Copernicus journal article supplement (doi:10.5194/hess-19-1615-2015), 2015-04-08
Supplement: Supplementary file 1 [file hess-19-1615-2015-supplement.zip › Readme.pdf]

# **Guide to the Supplementary Material for**

## **Uncertainty in runoff based on Global Climate Model precipitation and temperature data - Part B: Estimation and uncertainty of annual runoff and reservoir yield**

**Peel MC, Srikanthan R, McMahon TA, Karoly DJ**

Following is a description of the files included in the Supplementary Material Section.

- 1) Readme.pdf
  - a. This document.
- 2) PERM.pdf
  - a. Description of PERM model structure, input data, calibration and model performance for 699 catchments.
- 3) PERM Function code.pdf
  - a. Excel VBA code for PERM.
- 4) PERM example input and output.txt
  - a. Example input and output from PERM for an Australian catchment.

Murray Peel

[mpeel@unimelb.edu.au](mailto:mpeel@unimelb.edu.au)

12/2/2014
