# Supplementary material for: Approximating uncertainty of annual runoff and reservoir yield using stochastic replicates of global climate model data
Source: Copernicus journal article supplement (doi:10.5194/hess-19-1615-2015), 2015-04-08
Supplement: Supplementary file 5 [file hess-19-1615-2015-supplement-cover-letter.pdf › hess-19-1615-2015-supplement-cover-letter.pdf]

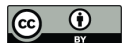

*Supplement of*

## **Approximating uncertainty of annual runoff and reservoir yield using stochastic replicates of global climate model data**

**M. C. Peel et al.**

*Correspondence to:* M. C. Peel ([mpeel@unimelb.edu.au](mailto:mpeel@unimelb.edu.au))

- [hess-19-1615-2015-supplement-cover-letter.pdf](#)
- [PERM Function code.pdf](#)
- [PERM example input and output.txt](#)
- [PERM.pdf](#)
- [Readme.pdf](#)
